# Supplementary material for: Analysis of Patients with Severe ARDS on VV ECMO Treated with Inhaled NO: A Retrospective Observational Study
Source: MDPI journal article supplement (doi:10.3390/jcm13061555), 2024-03-08
Supplement: s1 [file s1]

## Supplemental Material

| Table S1. Ventilation parameters and arterial blood gas analyses |                           |               |               |                               |               |               |
|------------------------------------------------------------------|---------------------------|---------------|---------------|-------------------------------|---------------|---------------|
| characteristic                                                   | with inhaled NO<br>(n=48) |               |               | without inhaled NO<br>(n=318) |               |               |
|                                                                  | Day 1                     | Day 3         | Day 7         | Day 1                         | Day 3         | Day 7         |
| ventilation parameters                                           |                           |               |               |                               |               |               |
| minute ventilation – (median (IQR)) [l/min]                      | 2.0 (1.5-3.1)             | 2.2 (1.8-3.7) | 3.8 (2.8-4.8) | 2.2 (1.5-3.2)                 | 2.4 (1.6-3.5) | 3.6 (2.3-5.9) |
| PEEP – (median (IQR)) [mbar]                                     | 20 (18-20)                | 20 (18-20)    | 18 (16-20)    | 18 (15-20)                    | 18 (14-20)    | 18 (16-18)    |
| peak inspiratory pressure – (median (IQR)) [mbar]                | 26 (25-28)                | 26 (25-28)    | 27 (26-28)    | 26 (25-28)                    | 26 (24-28)    | 26 (24-28)    |
| arterial blood gas analyses                                      |                           |               |               |                               |               |               |
| PaO <sub>2</sub> – (median (IQR)) [mmHg]                         | 102 (100-105)             | 101 (79-124)  | 100 (85-113)  | 104 (102-105)                 | 104 (102-116) | 105 (101-113) |
| PaCO <sub>2</sub> – (median (IQR)) [mmHg]                        | 38 (35-44)                | 39 (36-43)    | 42 (35-46)    | 37 (35-40)                    | 40 (37-44)    | 38 (37-47)    |
| pH – (median (IQR))                                              | 7.30 (7.3-7.4)            | 7.3 (7.3-7.4) | 7.3 (7.3-7.4) | 7.3 (7.3-7.4)                 | 7.4 (7.3-7.4) | 7.3 (7.3-7.4) |
| PaO <sub>2</sub> /F <sub>i</sub> O <sub>2</sub> – (median (IQR)) | 88 (67-109)               | 93 (75-111)   | 96 (78-131)   | 86 (66-107)                   | 96 (79-121)   | 109 (88-155)  |
| minimal F <sub>i</sub> O <sub>2</sub> of a 24 hrs period (%)     | 80                        | 70            | 70            | 70                            | 65            | 50            |

inhaled NO: inhaled nitric oxide. IQR: interquartile range. PEEP: positive end-expiratory pressure. PaO<sub>2</sub>: arterial partial pressure of oxygen. PaCO<sub>2</sub>: arterial partial pressure of carbon dioxide. F<sub>i</sub>O<sub>2</sub>: fraction of inspired oxygen.

| Table S2. In-hospital survival analyses         |                  |                           |                               |         |
|-------------------------------------------------|------------------|---------------------------|-------------------------------|---------|
| characteristic                                  | TOTAL<br>(n=366) | with inhaled NO<br>(n=48) | without inhaled NO<br>(n=318) | p-value |
| outcome                                         |                  |                           |                               |         |
| length of ICU stay – (median (IQR)) [days]      | 25 (13-47)       | 21 (13–35)                | 25 (13–49)                    | 0.1900  |
| length of hospital stay – (median (IQR)) [days] | 27 (14– 53)      | 24 (14– 35)               | 27 (15–56)                    | 0.1613  |
| in-hospital death – n(%)                        | 220 (60)         | 34 (71)                   | 186 (58)                      | 0.1036  |
| median survival time – (median (IQR)) [days]    | 32 (13-379)      | 20 (12-43)                | 34 (18-385)                   | 0.0590  |

inhaled NO: inhaled nitric oxide. ICU: intensive care unit. IQR: interquartile range.  $p < 0.05$  considered to be significant.

| Table S3. Known medical history indicated by Charlson Comorbidity Index |                  |                           |                               |         |
|-------------------------------------------------------------------------|------------------|---------------------------|-------------------------------|---------|
| characteristic                                                          | TOTAL<br>(n=366) | with inhaled NO<br>(n=48) | without inhaled NO<br>(n=318) | p-value |
| comorbidity                                                             |                  |                           |                               |         |
| myocardial infarction – n (%)                                           | 27 (7)           | 2 (4)                     | 25 (8)                        | 0.5543  |
| congestive heart failure – n (%)                                        | 29 (8)           | 4 (8)                     | 25 (8)                        | 0.7814  |
| peripheral vascular disease – n (%)                                     | 28 (8)           | 2 (4)                     | 26 (8)                        | 0.5577  |
| cerebrovascular disease or TIA – n (%)                                  | 39 (11)          | 4 (8)                     | 35 (11)                       | 0.5759  |
| dementia – n (%)                                                        | 3 (1)            | 0 (0)                     | 1 (3)                         | 1.0000  |
| COPD – n (%)                                                            | 104 (28)         | 14 (29)                   | 90 (28)                       | 0.9015  |
| Connective tissue disease – n (%)                                       | 8 (2)            | 0 (0)                     | 8 (3)                         | 0.6037  |
| peptic ulcer disease – n (%)                                            | 10 (3)           | 2 (4)                     | 8 (3)                         | 0.6263  |
| mild liver disease – n (%)                                              | 20 (5)           | 5 (10)                    | 15 (5)                        | 0.1609  |
| moderate to severe liver disease – n (%)                                | 6 (2)            | 0 (0)                     | 6 (2)                         | 1.0000  |
| diabetes without end organ damage – n (%)                               | 57 (16)          | 7 (15)                    | 50 (16)                       | 0.8391  |
| diabetes with end organ damage – n (%)                                  | 28 (8)           | 3 (6)                     | 25 (8)                        | 1.0000  |
| hemiplegia – n (%)                                                      | 3 (1)            | 1 (2)                     | 2 (1)                         | 0.3449  |
| moderate to severe CKD – n (%)                                          | 31 (8)           | 1 (2)                     | 30 (9)                        | 0.0999  |
| solid tumor – n (%)                                                     | 31 (8)           | 1 (2)                     | 30 (9)                        | 0.0999  |
| leukemia – n (%)                                                        | 7 (2)            | 3 (6)                     | 4 (1)                         | 0.0507  |
| lymphoma – n (%)                                                        | 10 (3)           | 0 (0)                     | 10 (3)                        | 0.3713  |
| metastatic solid tumor                                                  | 7 (2)            | 0 (0)                     | 7 (2)                         | 0.6010  |
| AIDS – n (%)                                                            | 2 (1)            | 0 (0)                     | 2 (1)                         | 1.0000  |
| CCI                                                                     | 1 (0-2)          | 1 (0-2)                   | 1 (0-2)                       | 0.0511  |

inhaled NO: inhaled nitric oxide. CCI: Charlson Comorbidity Index. TIA: transient ischemic attack. COPD: chronic obstructive pulmonary disease. CKD: chronic kidney disease. AIDS: Acquired Immuno Deficiency Syndrome. p<0.05 considered to be significant.
